# Supplementary material for: Multiscale Analysis of Surface Texture Quality of Models Manufactured by Laser Powder-Bed Fusion Technology and Machining from 316L Steel
Source: MDPI journal article supplement (doi:10.3390/ma14112794), 2021-05-24
Supplement: s1 [file s1]

# Multiscale Analysis of Surface Texture Quality of Models Manufactured by Laser Powder-Bed Fusion Technology and Machining from 316L Steel

Damian Gogolewski <sup>1,\*</sup>, Tomasz Bartkowiak <sup>2</sup>, Tomasz Kozior <sup>1</sup> and Paweł Zmarzły <sup>1</sup>

<sup>1</sup> Department of Manufacturing Technology and Metrology, Kielce University of Technology, 25-314 Kielce, Poland; tkoziar@tu.kielce.pl (T.K.); pzmarzly@tu.kielce.pl (P.Z.)

<sup>2</sup> Institute of Mechanical Technology, Poznan University of Technology; 60-965 Poznań, Poland; to-masz.bartkowiak@put.poznan.pl

\* Correspondence: dgogolewski@tu.kielce.pl

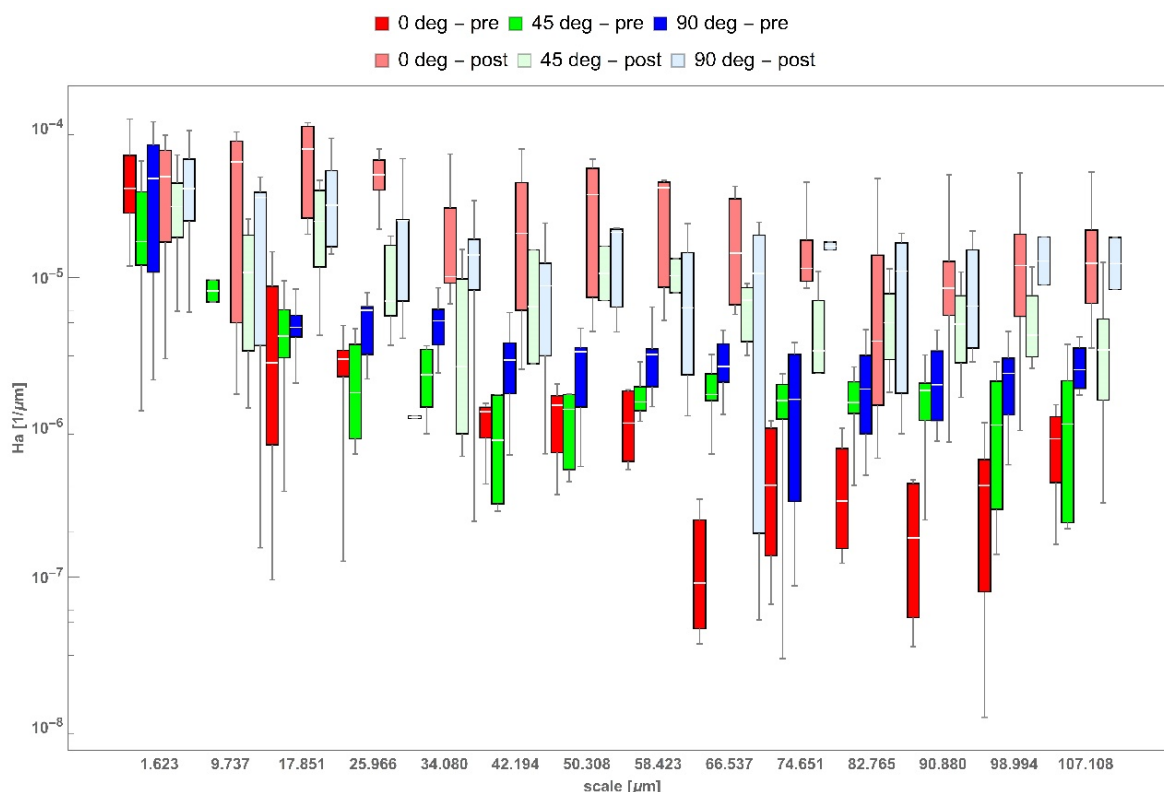

**Figure S1.** Evolution of selected curvature parameters with scale—average mean curvature—Ha. Please note that “pre” and “post” terms refer to post-processing via machining.

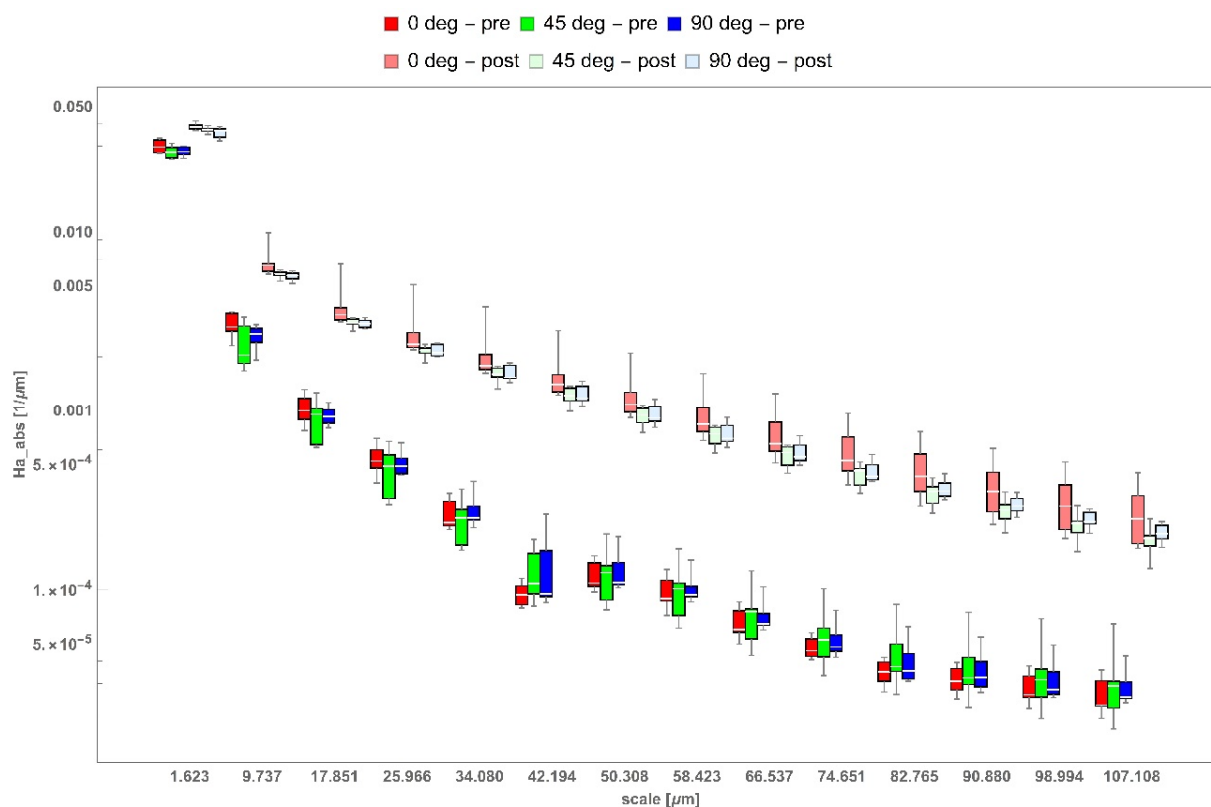

**Figure S2.** Evolution of selected curvature parameters with scale—average absolute mean curvature— $H_{a\_abs}$ . Please note that “pre” and “post” terms refer to post-processing via machining.

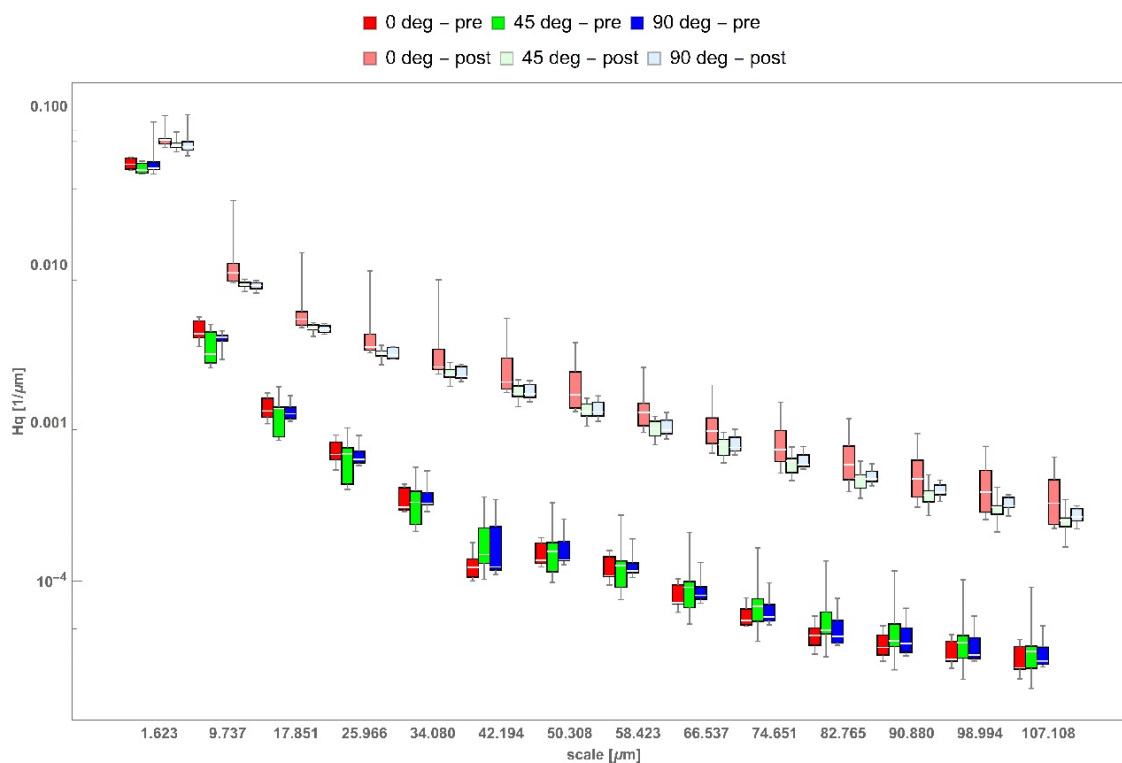

**Figure S3.** Evolution of selected curvature parameters with scale—SD of mean curvature— $H_q$ . Please note that “pre” and “post” terms refer to post-processing via machining.

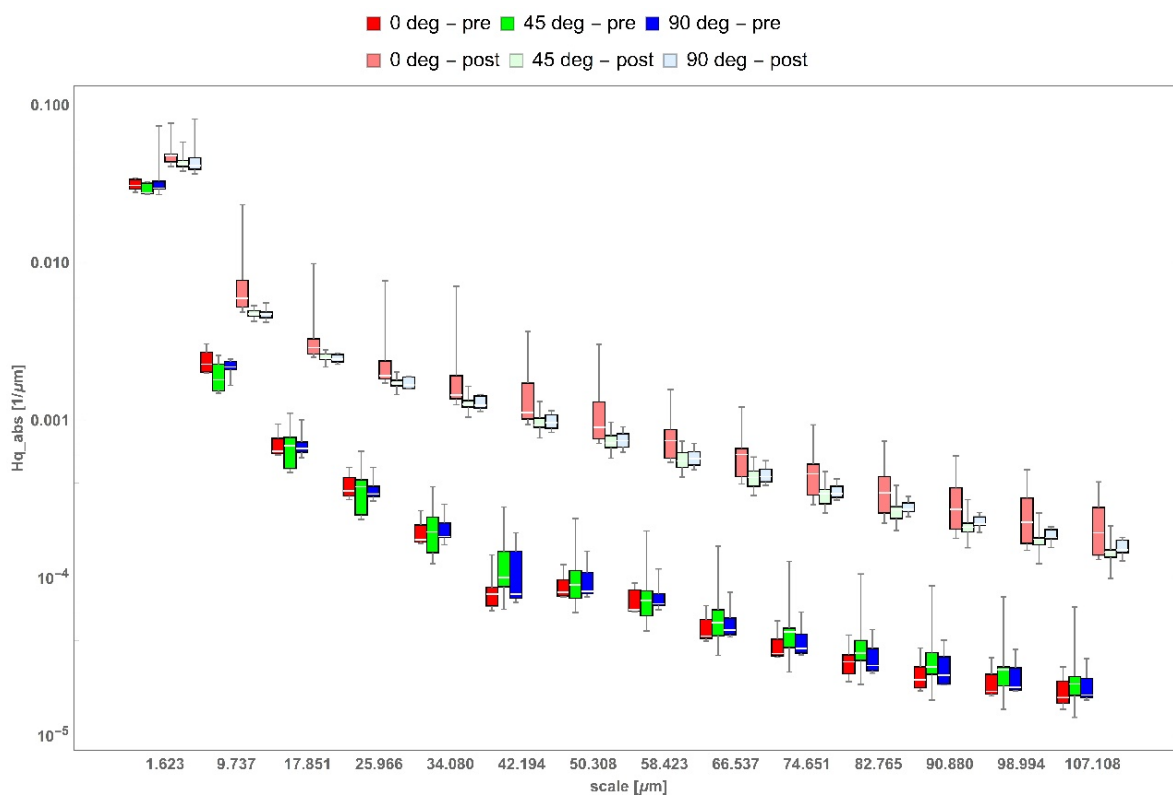

**Figure S4.** Evolution of selected curvature parameters with scale—SD of absolute mean curvature— $Hq_{abs}$ . Please note that “pre” and “post” terms refer to post-processing via machining.

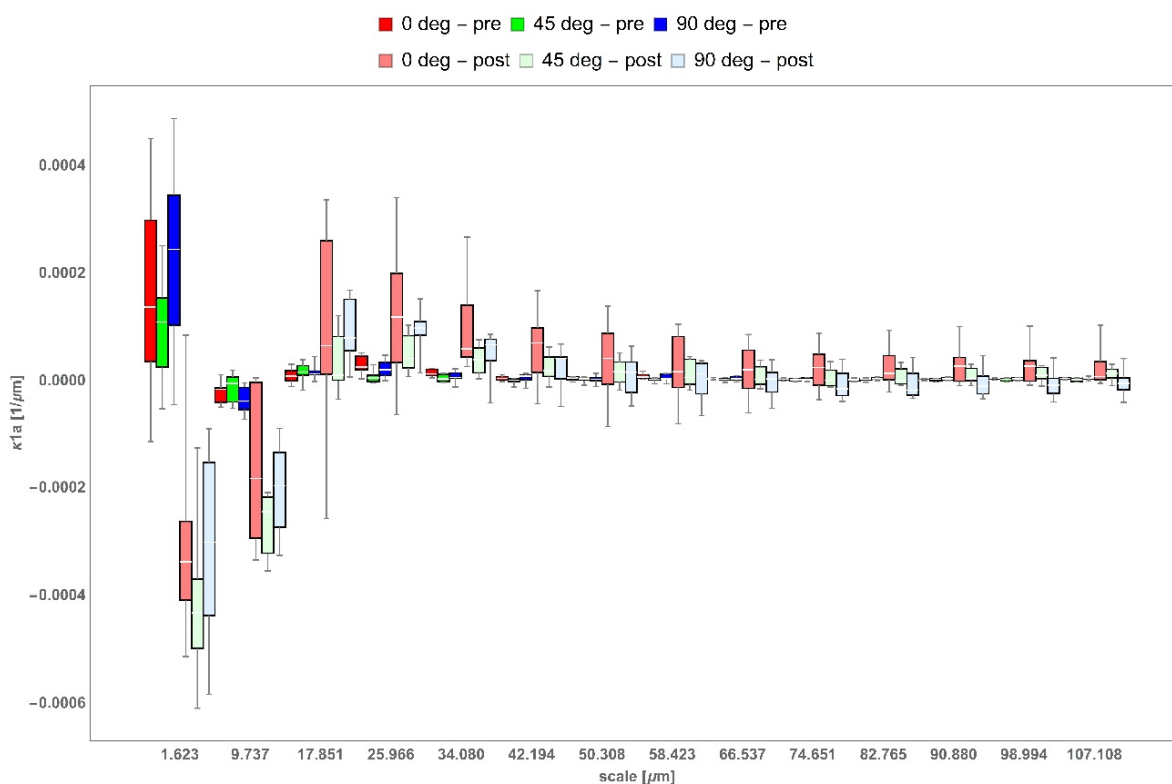

**Figure S5.** Evolution of selected curvature parameters with scale—average maximum curvature— $\kappa_{1a}$ . Please note that “pre” and “post” terms refer to post-processing via machining.

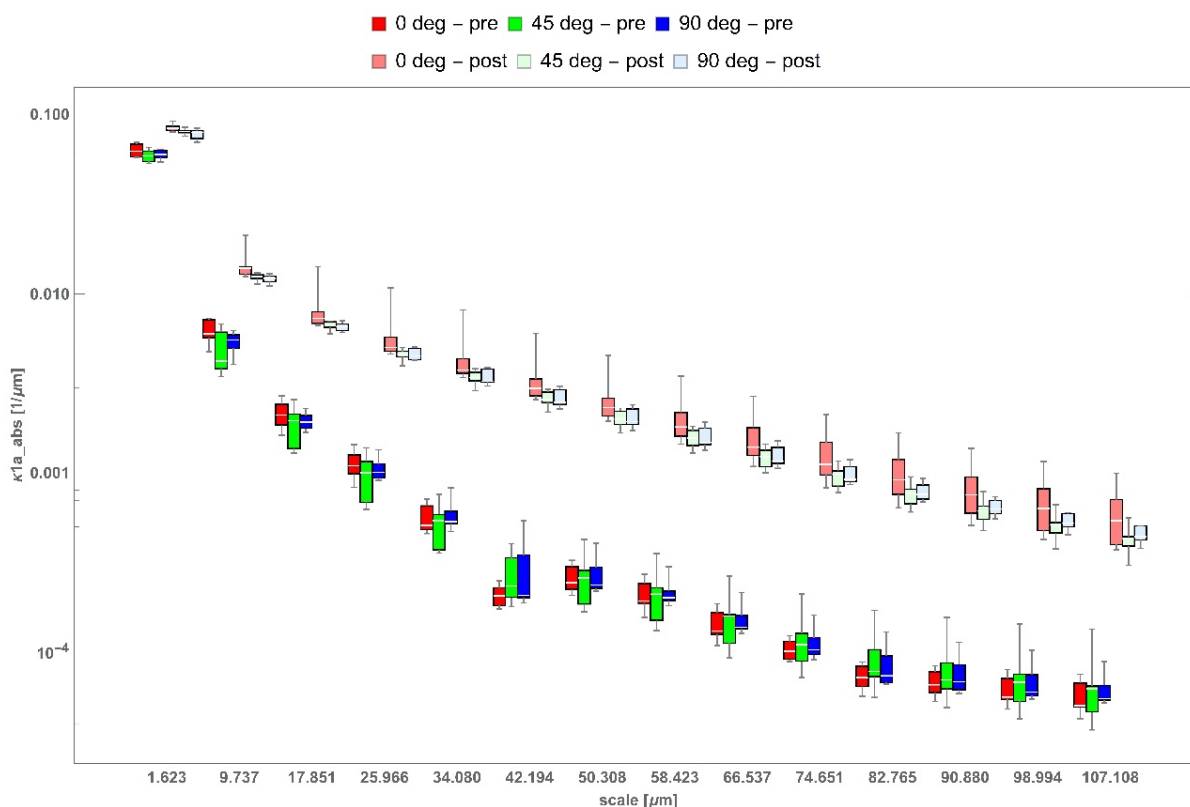

**Figure S6.** Evolution of selected curvature parameters with scale—average absolute maximum curvature— $\kappa1a_{abs}$ . Please note that “pre” and “post” terms refer to post-processing via machining.

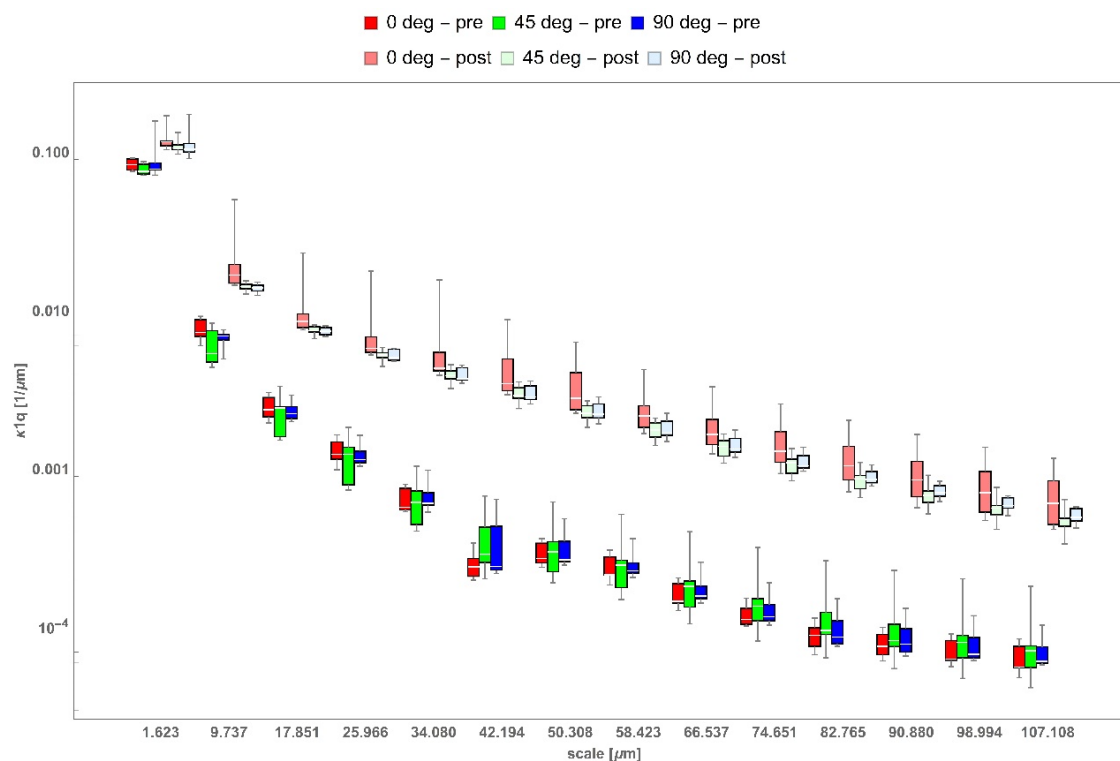

**Figure S7.** Evolution of selected curvature parameters with scale—SD of maximum curvature— $\kappa1q$ . Please note that “pre” and “post” terms refer to post-processing via machining.

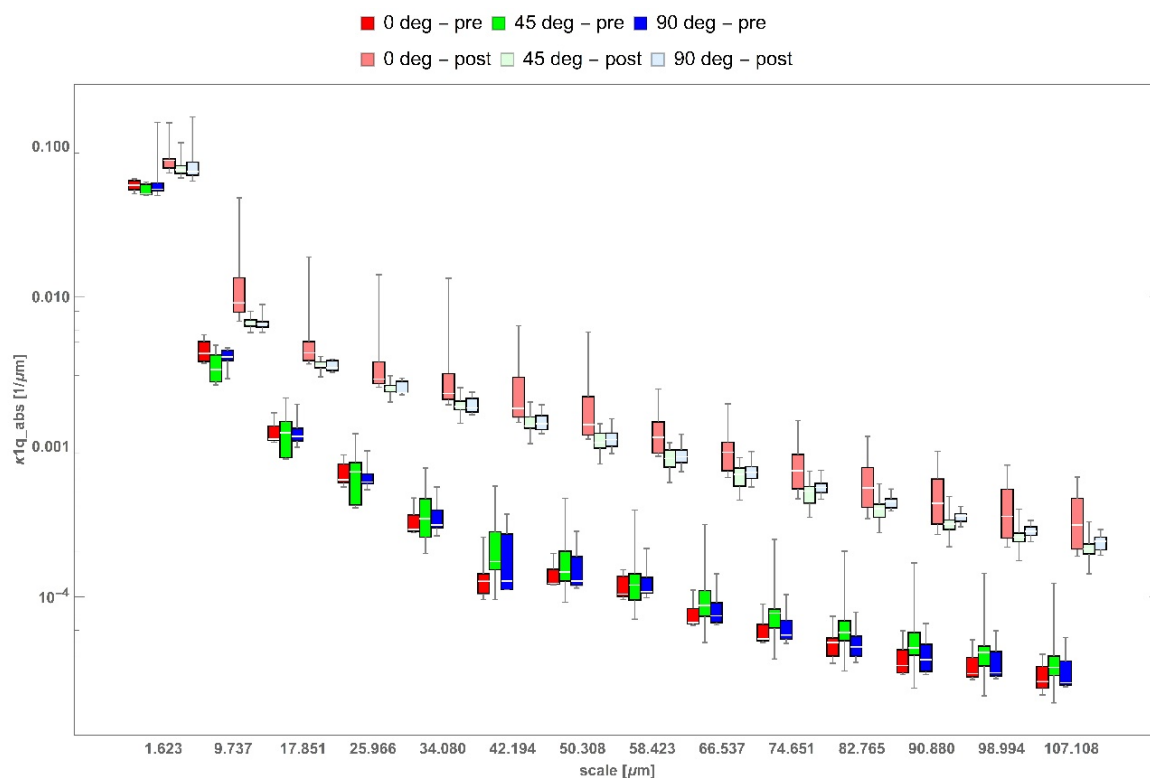

**Figure S8.** Evolution of selected curvature parameters with scale—SD of absolute maximum curvature— $\kappa1q_{abs}$ . Please note that “pre” and “post” terms refer to post-processing via machining.

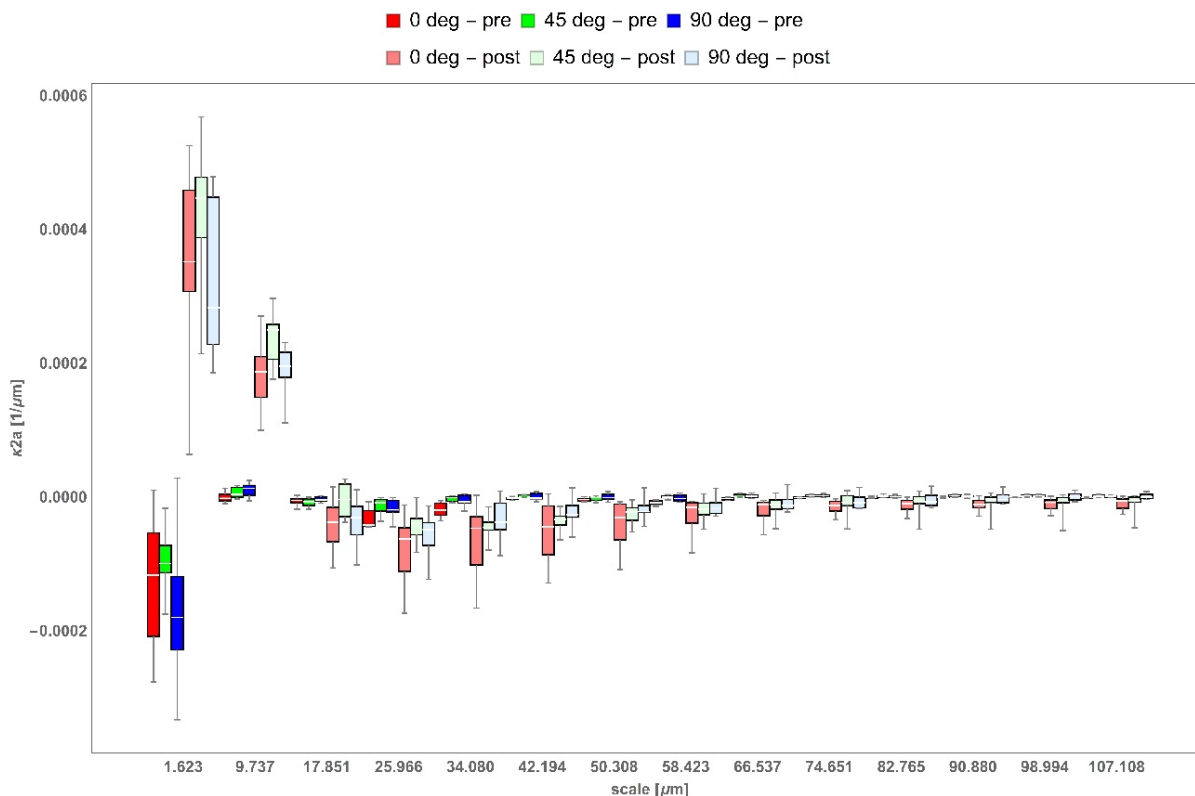

**Figure S9.** Evolution of selected curvature parameters with scale—average minimum curvature— $\kappa2a$ . Please note that “pre” and “post” terms refer to post-processing via machining.

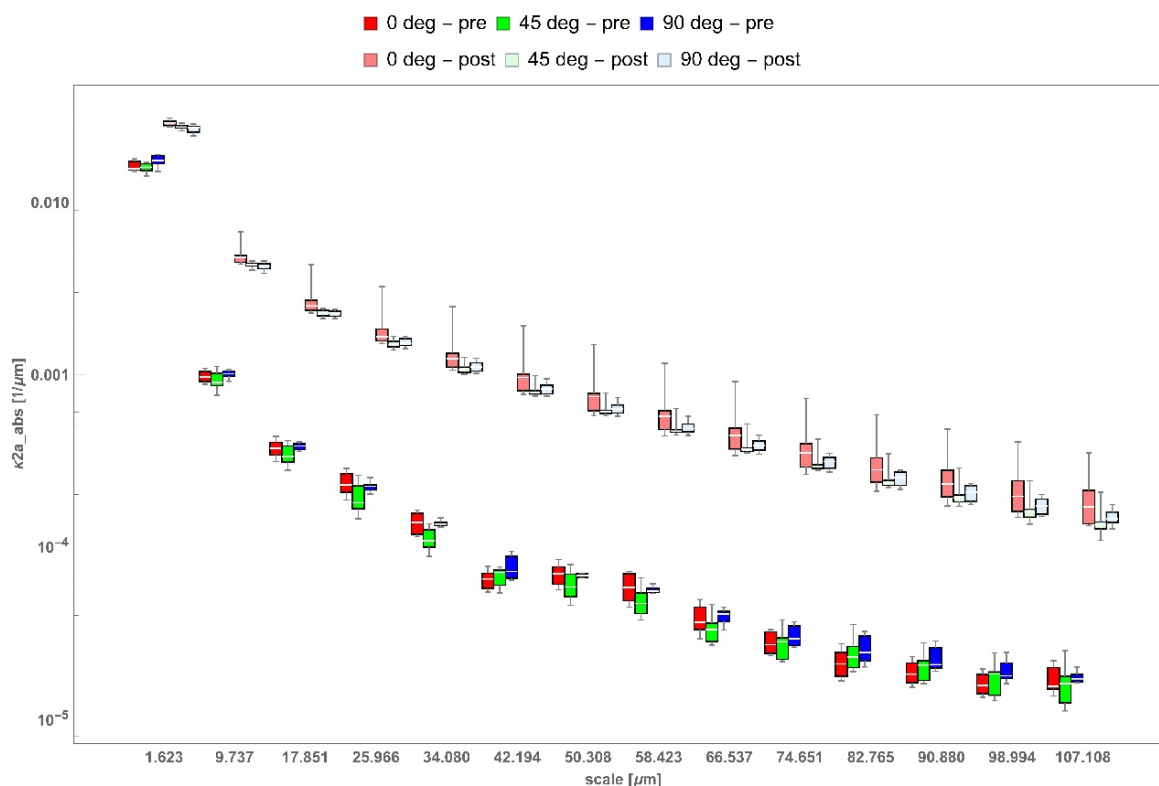

**Figure S10.** Evolution of selected curvature parameters with scale—average absolute minimum curvature— $\kappa_{2a\_abs}$ . Please note that “pre” and “post” terms refer to post-processing via machining.

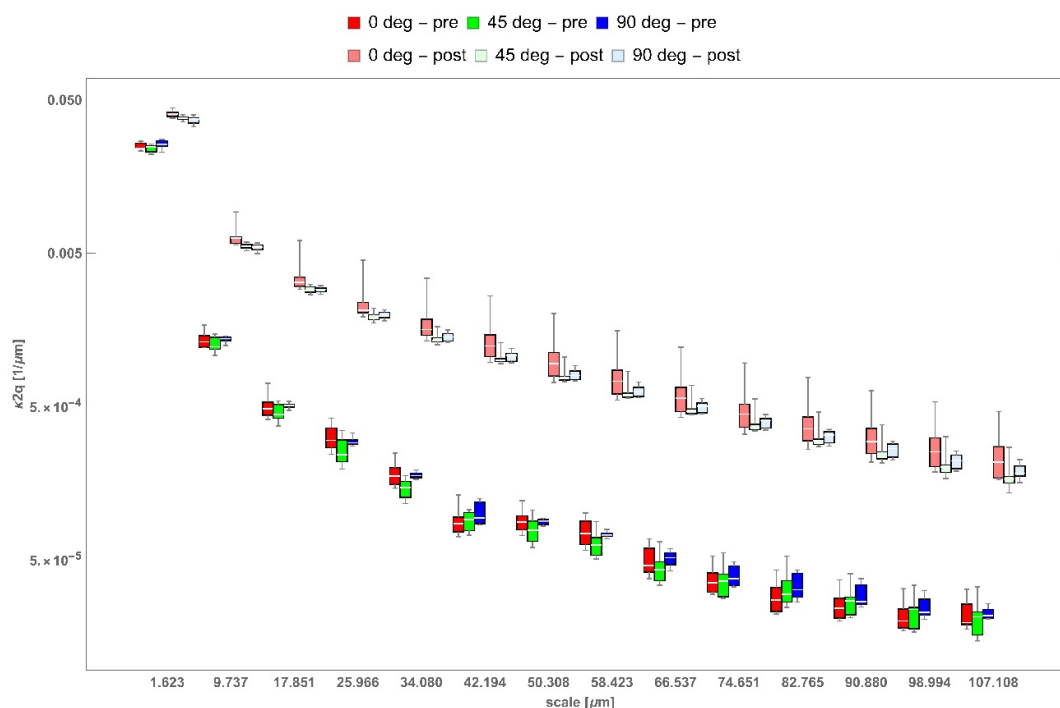

**Figure S11.** Evolution of selected curvature parameters with scale—SD of minimum curvature— $\kappa_{2q}$ . Please note that “pre” and “post” terms refer to post-processing via machining.

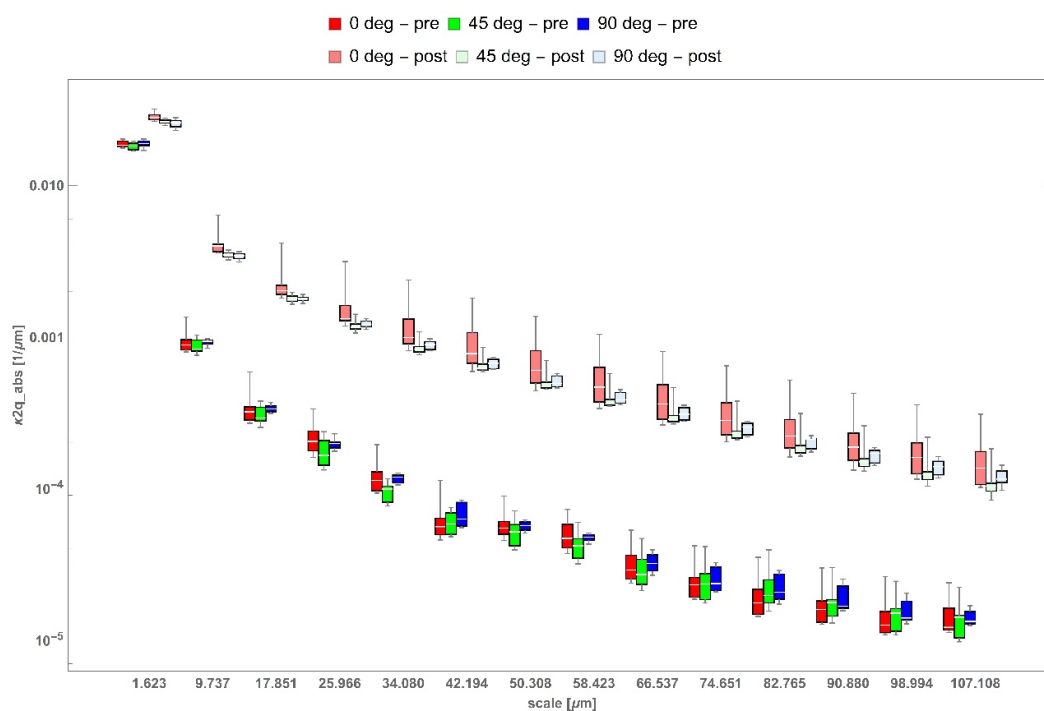

**Figure S12.** Evolution of selected curvature parameters with scale—SD of absolute minimum curvature— $\kappa_{2q\_abs}$ . Please note that “pre” and “post” terms refer to post-processing via machining.

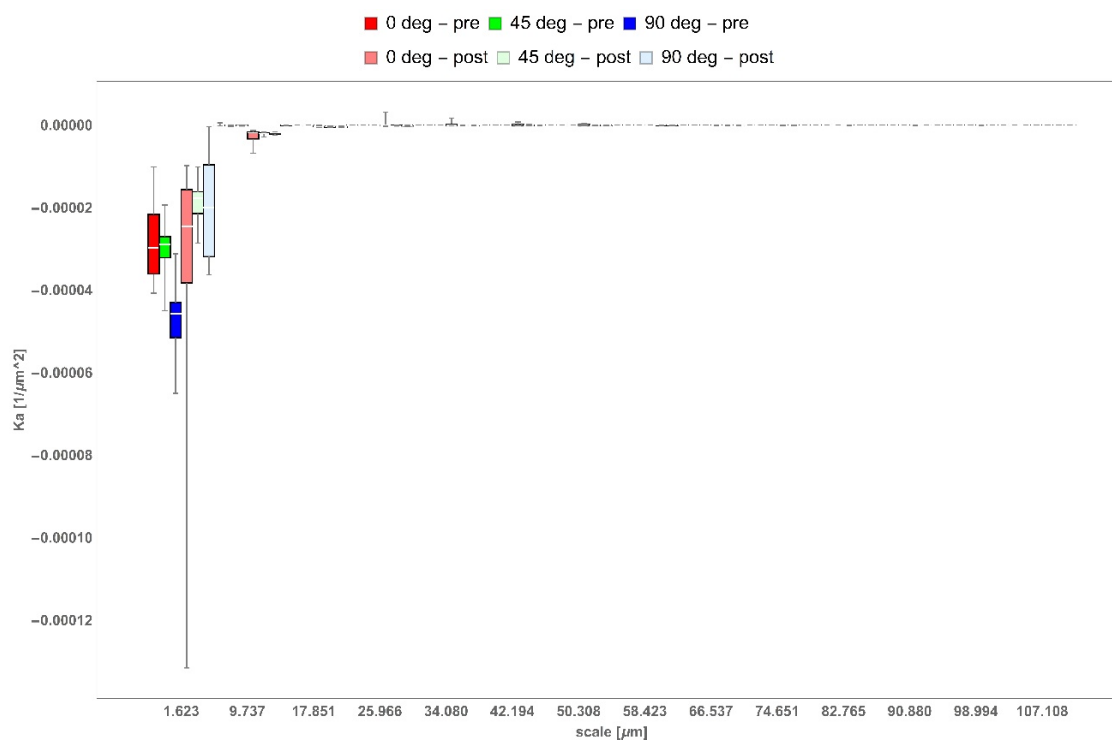

**Figure S13.** Evolution of selected curvature parameters with scale—average Gaussian curvature— $K_a$ . Please note that “pre” and “post” terms refer to post-processing via machining.

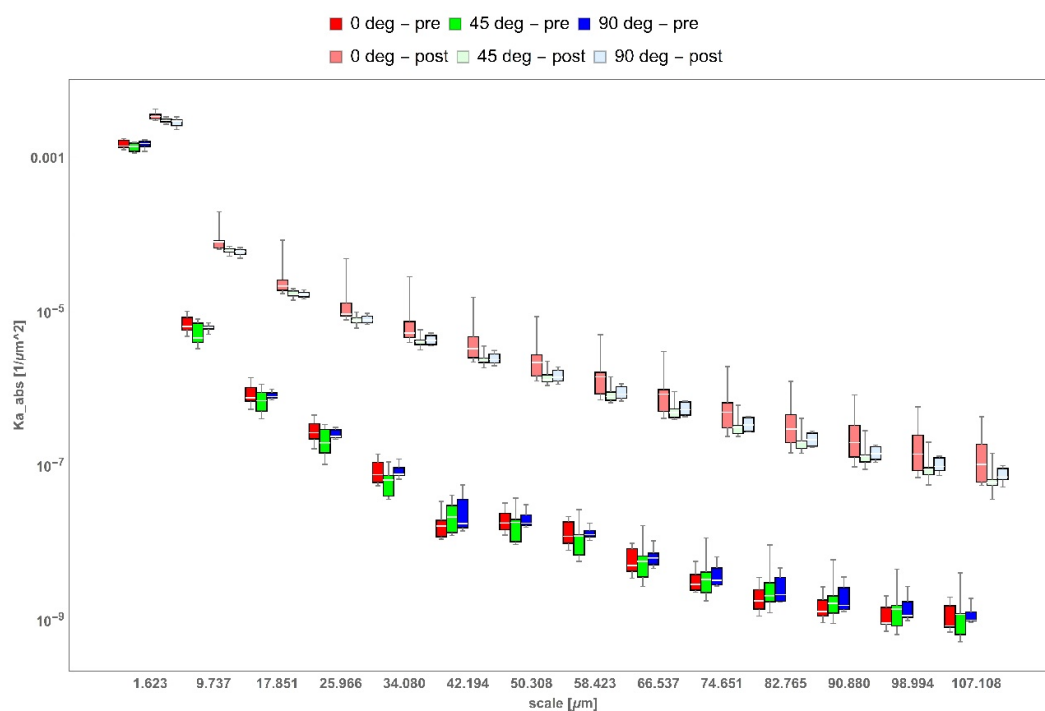

**Figure S14.** Evolution of selected curvature parameters with scale—average absolute Gaussian curvature— $K_{a,abs}$ . Please note that “pre” and “post” terms refer to post-processing via machining.

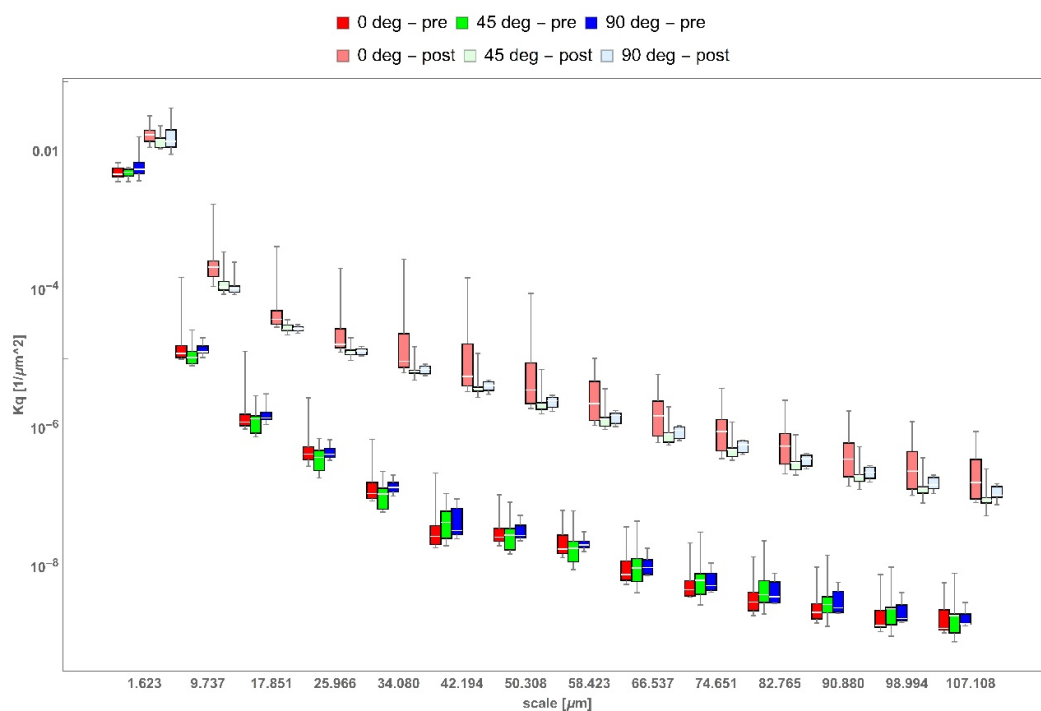

**Figure S15.** Evolution of selected curvature parameters with scale—SD of Gaussian curvature— $K_q$ . Please note that “pre” and “post” terms refer to post-processing via machining.



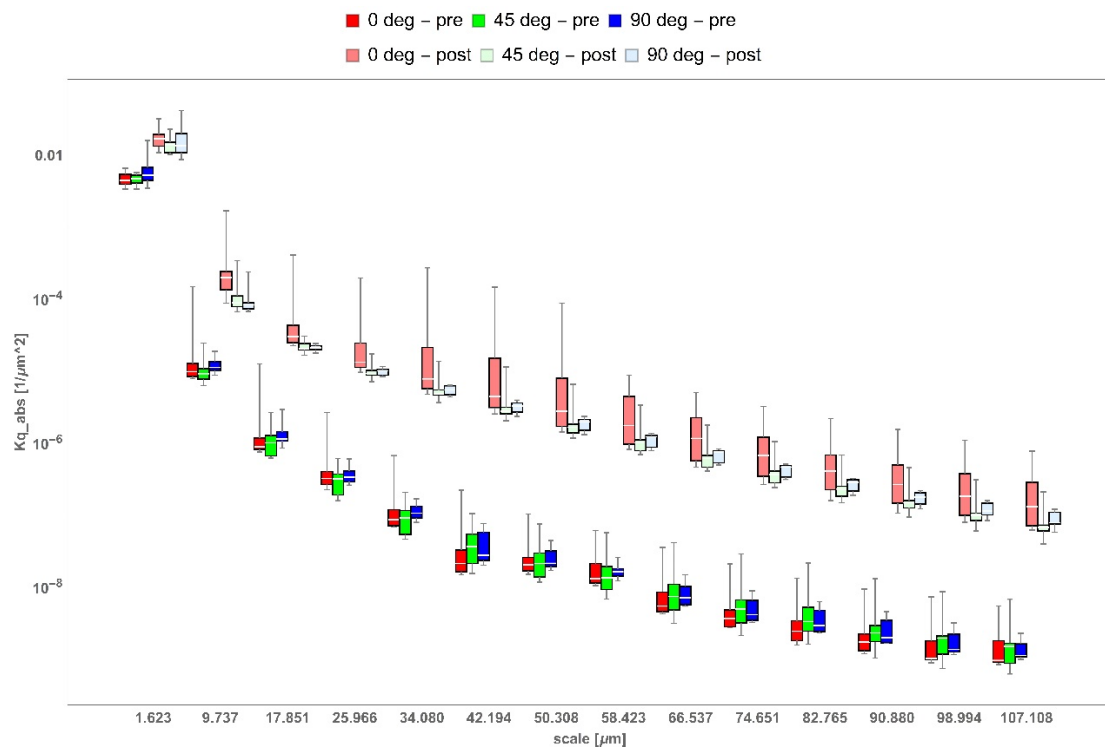

**Figure S16.** Evolution of selected curvature parameters with scale—SD of absolute Gaussian curvature— $Kq_{abs}$ . Please note that “pre” and “post” terms refer to post-processing via machining.

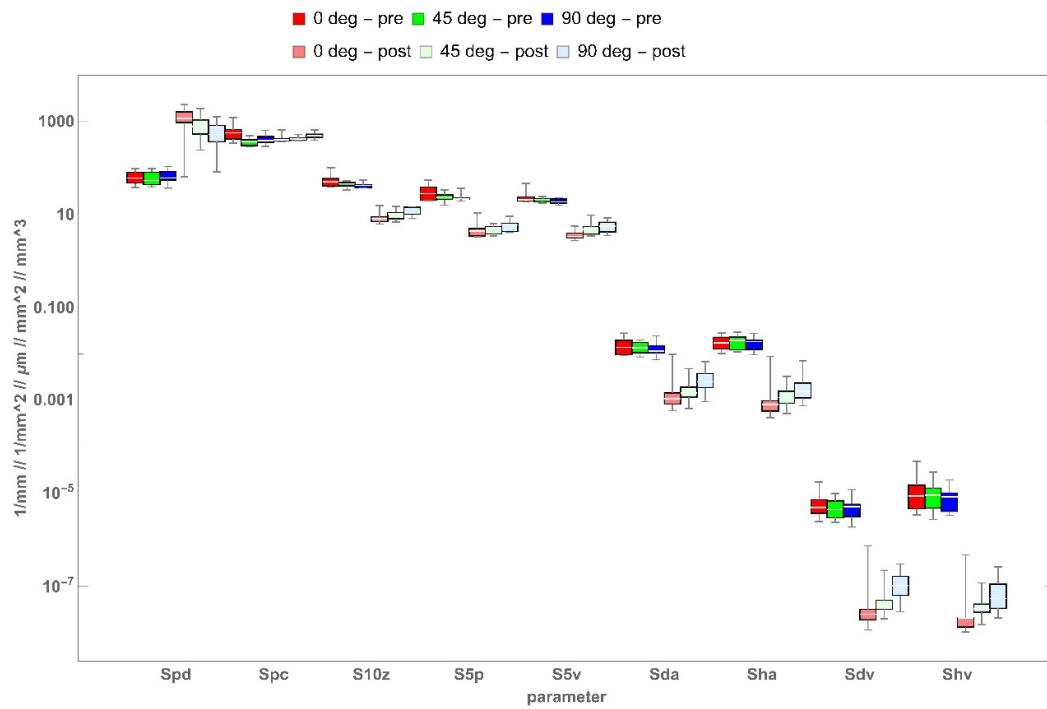

**Figure S17.** Feature areal parameters.

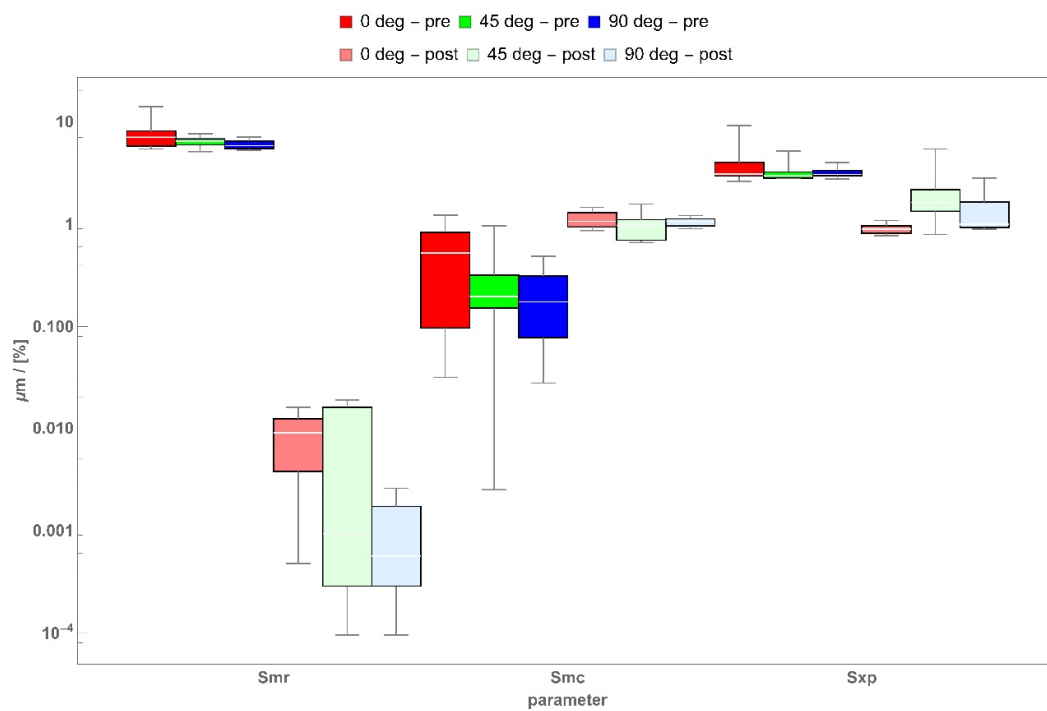

Figure S18. Functional areal parameters—part 1.

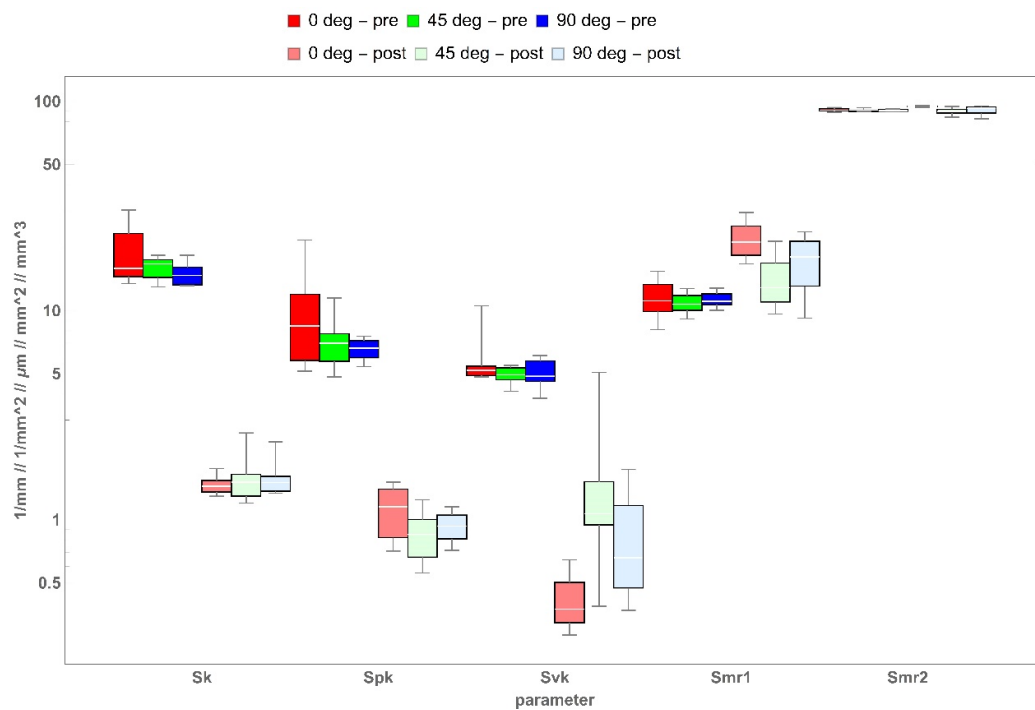

Figure S19. Functional areal parameters—part 2.

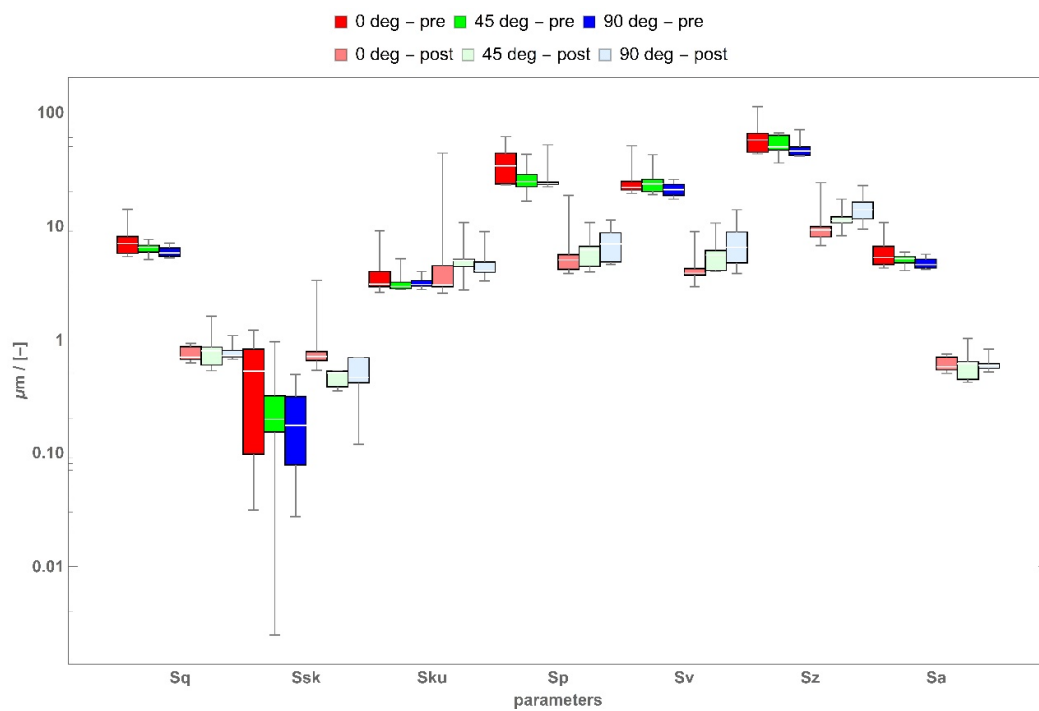

Figure S20. Height areal parameters.

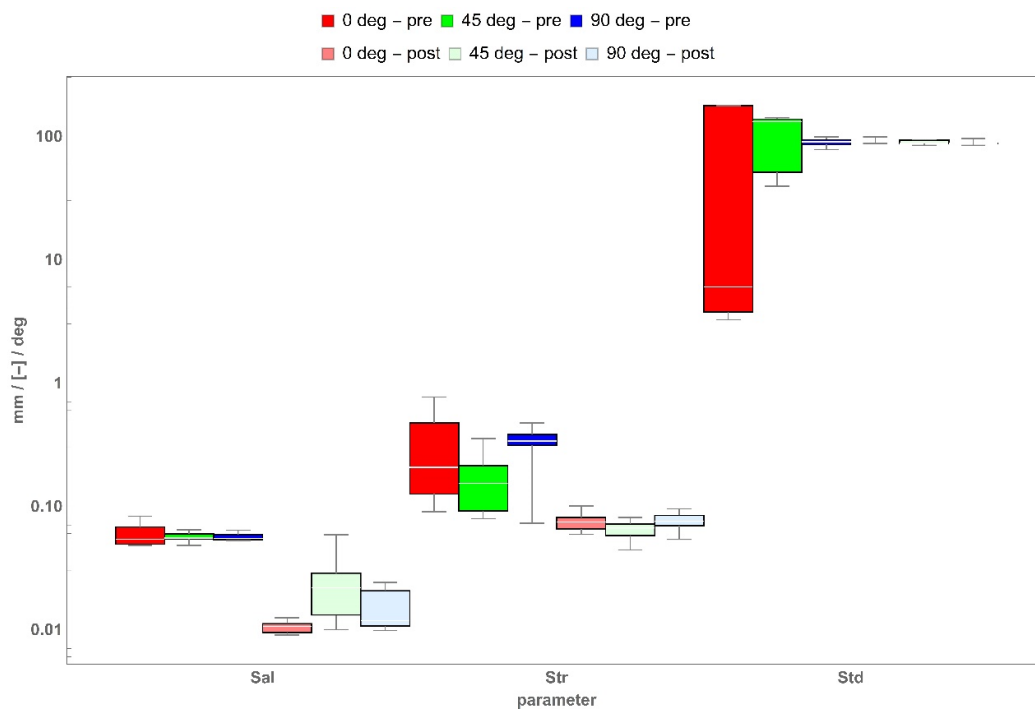

Figure S21. Spatial areal parameters.

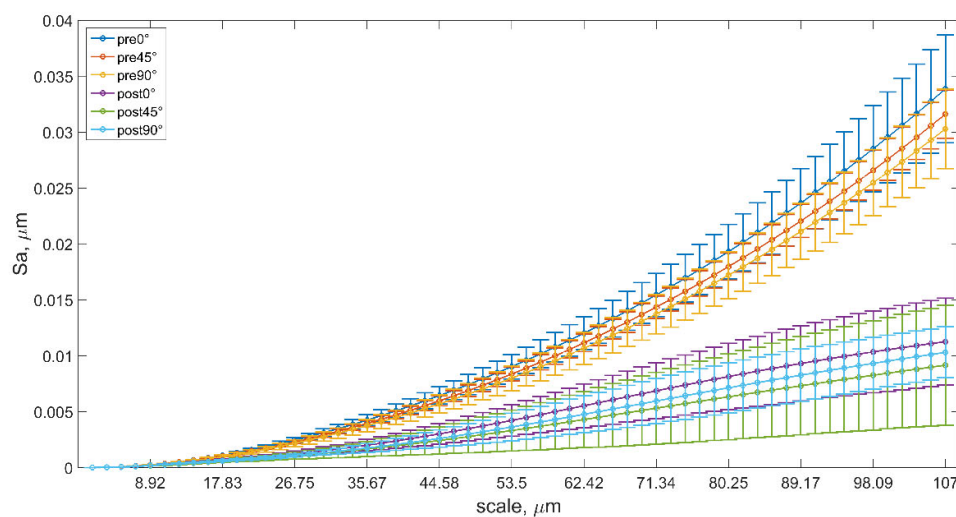

**Figure S22.** Evolution of arithmetical mean height ( $S_a$ ) with scale. Please note that “pre” and “post” terms refer to post-processing via machining.

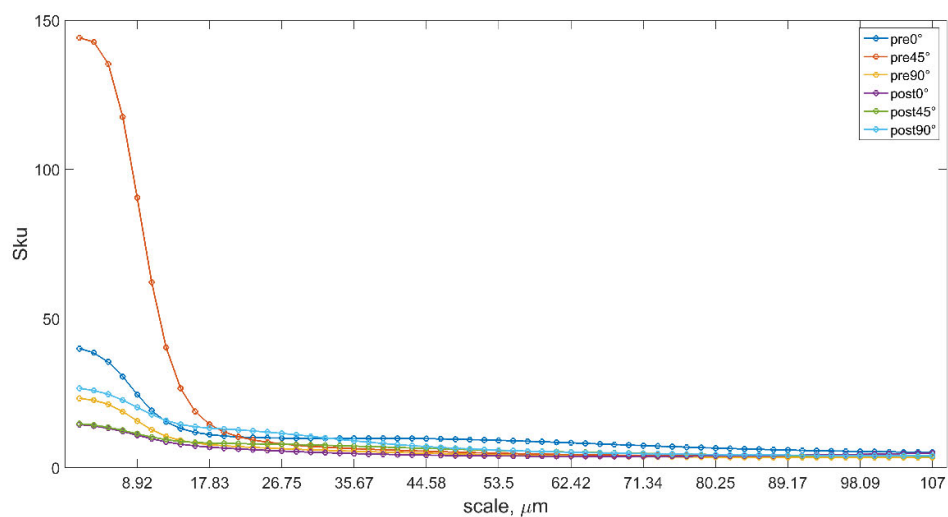

**Figure S23.** Evolution of kurtosis ( $S_{ku}$ ) with scale. Please note that “pre” and “post” terms refer to post-processing via machining.

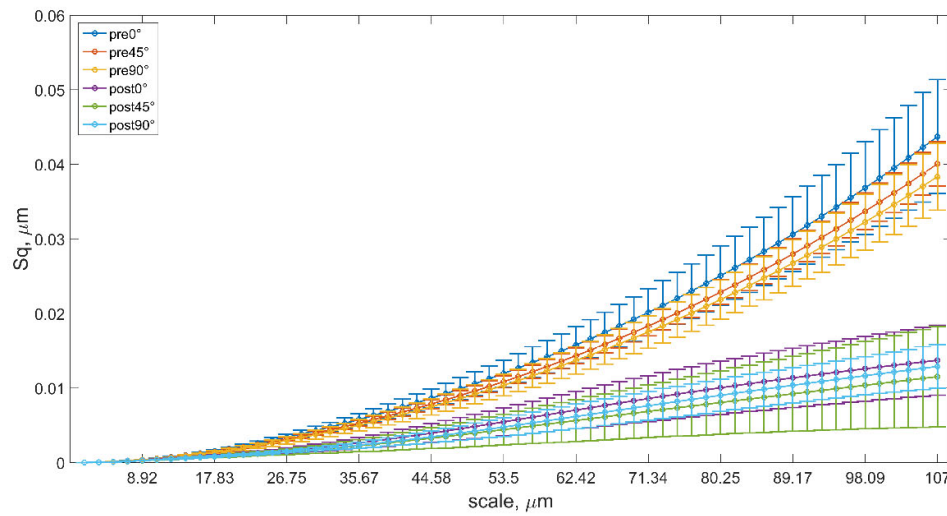

**Figure S24.** Evolution of root mean square height ( $S_q$ ) with scale. Please note that “pre” and “post” terms refer to post-processing via machining.

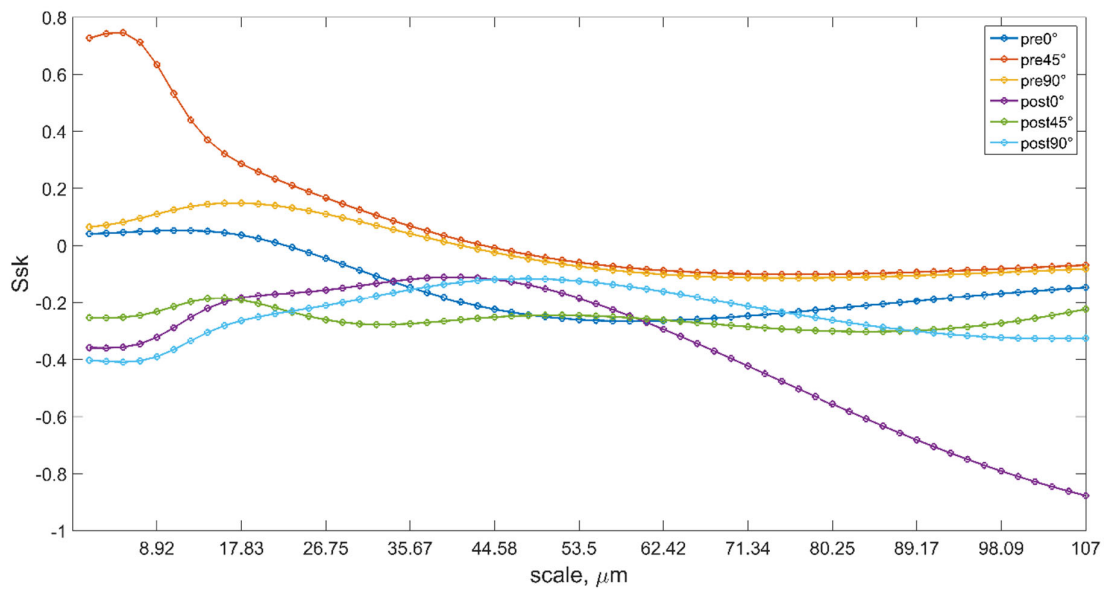

**Figure S25.** Evolution of skewness ( $S_{sk}$ ) with scale. Please note that “pre” and “post” terms refer to post-processing via machining.

| scale, $\mu\text{m}$ | $\kappa 1a$ | $\kappa 1q$ | $\kappa 2a$ | $\kappa 2q$ | Ha    | Hq    | Ka    | Kq    | $\kappa 1a_{abs}$ | $\kappa 1q_{abs}$ | $\kappa 2a_{abs}$ | $\kappa 2q_{abs}$ | Ha_abs | Hq_abs | Ka_abs | Kq_abs |
|----------------------|-------------|-------------|-------------|-------------|-------|-------|-------|-------|-------------------|-------------------|-------------------|-------------------|--------|--------|--------|--------|
| 1.623                | 0.020       | 0.354       | 0.012       | 0.002       | 0.250 | 0.337 | 0.101 | 0.388 | 0.000             | 0.456             | 0.031             | 0.000             | 0.000  | 0.429  | 0.000  | 0.393  |
| 4.869                | 0.442       | 0.000       | 0.432       | 0.000       | 0.640 | 0.000 | 0.719 | 0.004 | 0.000             | 0.000             | 0.000             | 0.000             | 0.000  | 0.000  | 0.000  | 0.005  |
| 8.114                | 0.290       | 0.001       | 0.111       | 0.000       | 0.366 | 0.001 | 0.416 | 0.068 | 0.000             | 0.006             | 0.000             | 0.000             | 0.000  | 0.004  | 0.002  | 0.073  |
| 9.737                | 0.260       | 0.013       | 0.032       | 0.001       | 0.549 | 0.012 | 0.346 | 0.128 | 0.000             | 0.029             | 0.000             | 0.001             | 0.000  | 0.028  | 0.008  | 0.130  |
| 11.360               | 0.183       | 0.004       | 0.024       | 0.002       | 0.458 | 0.003 | 0.315 | 0.115 | 0.000             | 0.013             | 0.001             | 0.003             | 0.000  | 0.011  | 0.018  | 0.120  |
| 14.606               | 0.431       | 0.022       | 0.006       | 0.006       | 0.821 | 0.020 | 0.354 | 0.169 | 0.003             | 0.056             | 0.005             | 0.008             | 0.003  | 0.047  | 0.045  | 0.179  |
| 17.851               | 0.473       | 0.048       | 0.038       | 0.010       | 0.810 | 0.044 | 0.309 | 0.189 | 0.009             | 0.105             | 0.010             | 0.011             | 0.009  | 0.089  | 0.067  | 0.199  |
| 17.851               | 0.473       | 0.048       | 0.038       | 0.010       | 0.810 | 0.044 | 0.309 | 0.189 | 0.009             | 0.105             | 0.010             | 0.011             | 0.009  | 0.089  | 0.067  | 0.199  |
| 21.097               | 0.242       | 0.062       | 0.007       | 0.012       | 0.708 | 0.056 | 0.219 | 0.139 | 0.018             | 0.131             | 0.011             | 0.012             | 0.016  | 0.107  | 0.080  | 0.147  |
| 24.343               | 0.067       | 0.110       | 0.014       | 0.013       | 0.440 | 0.102 | 0.265 | 0.251 | 0.024             | 0.175             | 0.013             | 0.013             | 0.022  | 0.155  | 0.092  | 0.258  |
| 25.966               | 0.069       | 0.070       | 0.014       | 0.014       | 0.445 | 0.065 | 0.253 | 0.175 | 0.025             | 0.118             | 0.015             | 0.014             | 0.022  | 0.103  | 0.095  | 0.182  |
| 27.588               | 0.069       | 0.077       | 0.016       | 0.016       | 0.491 | 0.071 | 0.246 | 0.169 | 0.026             | 0.123             | 0.018             | 0.014             | 0.022  | 0.110  | 0.098  | 0.175  |
| 30.834               | 0.057       | 0.085       | 0.016       | 0.020       | 0.533 | 0.077 | 0.196 | 0.144 | 0.031             | 0.129             | 0.025             | 0.015             | 0.026  | 0.116  | 0.100  | 0.148  |
| 34.080               | 0.058       | 0.104       | 0.030       | 0.023       | 0.411 | 0.092 | 0.100 | 0.181 | 0.037             | 0.146             | 0.034             | 0.016             | 0.031  | 0.129  | 0.096  | 0.183  |
| 42.194               | 0.131       | 0.033       | 0.100       | 0.041       | 0.675 | 0.031 | 0.062 | 0.129 | 0.057             | 0.037             | 0.076             | 0.028             | 0.047  | 0.040  | 0.067  | 0.134  |
| 50.308               | 0.335       | 0.016       | 0.107       | 0.047       | 0.932 | 0.014 | 0.042 | 0.198 | 0.030             | 0.046             | 0.071             | 0.035             | 0.023  | 0.038  | 0.067  | 0.213  |
| 58.423               | 0.366       | 0.020       | 0.072       | 0.064       | 0.971 | 0.019 | 0.085 | 0.042 | 0.028             | 0.011             | 0.084             | 0.053             | 0.020  | 0.025  | 0.082  | 0.044  |
| 66.537               | 0.320       | 0.023       | 0.133       | 0.094       | 0.884 | 0.022 | 0.903 | 0.052 | 0.027             | 0.016             | 0.119             | 0.081             | 0.018  | 0.035  | 0.089  | 0.050  |
| 74.651               | 0.104       | 0.024       | 0.225       | 0.113       | 0.387 | 0.023 | 0.771 | 0.064 | 0.028             | 0.015             | 0.140             | 0.098             | 0.018  | 0.037  | 0.091  | 0.061  |
| 82.765               | 0.071       | 0.030       | 0.320       | 0.126       | 0.227 | 0.030 | 0.471 | 0.074 | 0.037             | 0.018             | 0.155             | 0.109             | 0.026  | 0.040  | 0.087  | 0.072  |
| 90.880               | 0.043       | 0.039       | 0.185       | 0.098       | 0.211 | 0.040 | 0.328 | 0.078 | 0.044             | 0.027             | 0.115             | 0.091             | 0.037  | 0.043  | 0.077  | 0.079  |
| 98.994               | 0.034       | 0.045       | 0.064       | 0.076       | 0.213 | 0.045 | 0.316 | 0.075 | 0.051             | 0.031             | 0.088             | 0.074             | 0.047  | 0.041  | 0.067  | 0.078  |
| 107.108              | 0.062       | 0.038       | 0.068       | 0.046       | 0.312 | 0.038 | 0.282 | 0.064 | 0.042             | 0.030             | 0.051             | 0.047             | 0.040  | 0.034  | 0.055  | 0.068  |

Figure S26. ANOVA—Curvature parameters—factor 1—build direct.

| scale, $\mu\text{m}$ | $\kappa 1a$ | $\kappa 1q$ | $\kappa 2a$ | $\kappa 2q$ | Ha    | Hq    | Ka    | Kq    | $\kappa 1a_{abs}$ | $\kappa 1q_{abs}$ | $\kappa 2a_{abs}$ | $\kappa 2q_{abs}$ | Ha_abs | Hq_abs | Ka_abs | Kq_abs |
|----------------------|-------------|-------------|-------------|-------------|-------|-------|-------|-------|-------------------|-------------------|-------------------|-------------------|--------|--------|--------|--------|
| 1.623                | 0.000       | 0.000       | 0.000       | 0.000       | 0.248 | 0.000 | 0.018 | 0.000 | 0.000             | 0.000             | 0.000             | 0.000             | 0.000  | 0.000  | 0.000  | 0.000  |
| 4.869                | 0.000       | 0.000       | 0.000       | 0.000       | 0.000 | 0.000 | 0.000 | 0.000 | 0.000             | 0.000             | 0.000             | 0.000             | 0.000  | 0.000  | 0.000  | 0.000  |
| 8.114                | 0.000       | 0.000       | 0.000       | 0.000       | 0.633 | 0.000 | 0.000 | 0.000 | 0.000             | 0.000             | 0.000             | 0.000             | 0.000  | 0.000  | 0.000  | 0.000  |
| 9.737                | 0.000       | 0.000       | 0.000       | 0.000       | 0.350 | 0.000 | 0.000 | 0.002 | 0.000             | 0.000             | 0.000             | 0.000             | 0.000  | 0.000  | 0.000  | 0.005  |
| 11.360               | 0.000       | 0.000       | 0.000       | 0.000       | 0.107 | 0.000 | 0.000 | 0.000 | 0.000             | 0.000             | 0.000             | 0.000             | 0.000  | 0.000  | 0.000  | 0.000  |
| 14.606               | 0.667       | 0.000       | 0.000       | 0.000       | 0.132 | 0.000 | 0.000 | 0.000 | 0.000             | 0.000             | 0.000             | 0.000             | 0.000  | 0.000  | 0.000  | 0.002  |
| 17.851               | 0.008       | 0.000       | 0.001       | 0.000       | 0.193 | 0.000 | 0.000 | 0.003 | 0.000             | 0.000             | 0.000             | 0.000             | 0.000  | 0.000  | 0.000  | 0.009  |
| 17.851               | 0.008       | 0.000       | 0.001       | 0.000       | 0.193 | 0.000 | 0.000 | 0.003 | 0.000             | 0.000             | 0.000             | 0.000             | 0.000  | 0.000  | 0.000  | 0.009  |
| 21.097               | 0.000       | 0.000       | 0.000       | 0.000       | 0.174 | 0.000 | 0.010 | 0.000 | 0.000             | 0.000             | 0.000             | 0.000             | 0.000  | 0.000  | 0.000  | 0.001  |
| 24.343               | 0.000       | 0.000       | 0.000       | 0.000       | 0.149 | 0.000 | 0.604 | 0.034 | 0.000             | 0.000             | 0.000             | 0.000             | 0.000  | 0.000  | 0.000  | 0.059  |
| 25.966               | 0.000       | 0.000       | 0.000       | 0.000       | 0.162 | 0.000 | 0.665 | 0.003 | 0.000             | 0.000             | 0.000             | 0.000             | 0.000  | 0.000  | 0.000  | 0.008  |
| 27.588               | 0.000       | 0.000       | 0.000       | 0.000       | 0.215 | 0.000 | 0.705 | 0.003 | 0.000             | 0.000             | 0.000             | 0.000             | 0.000  | 0.000  | 0.000  | 0.008  |
| 30.834               | 0.000       | 0.000       | 0.000       | 0.000       | 0.350 | 0.000 | 0.797 | 0.003 | 0.000             | 0.000             | 0.000             | 0.000             | 0.000  | 0.000  | 0.000  | 0.008  |
| 34.080               | 0.000       | 0.000       | 0.000       | 0.000       | 0.532 | 0.000 | 0.932 | 0.050 | 0.000             | 0.000             | 0.000             | 0.000             | 0.000  | 0.000  | 0.000  | 0.072  |
| 42.194               | 0.001       | 0.000       | 0.000       | 0.000       | 0.487 | 0.000 | 0.539 | 0.033 | 0.000             | 0.000             | 0.000             | 0.000             | 0.000  | 0.000  | 0.000  | 0.050  |
| 50.308               | 0.034       | 0.000       | 0.000       | 0.000       | 0.313 | 0.000 | 0.031 | 0.046 | 0.000             | 0.000             | 0.000             | 0.000             | 0.000  | 0.000  | 0.000  | 0.071  |
| 58.423               | 0.254       | 0.000       | 0.000       | 0.000       | 0.305 | 0.000 | 0.000 | 0.000 | 0.000             | 0.000             | 0.000             | 0.000             | 0.000  | 0.000  | 0.000  | 0.000  |
| 66.537               | 0.285       | 0.000       | 0.000       | 0.000       | 0.347 | 0.000 | 0.000 | 0.000 | 0.000             | 0.000             | 0.000             | 0.000             | 0.000  | 0.000  | 0.000  | 0.000  |
| 74.651               | 0.236       | 0.000       | 0.000       | 0.000       | 0.493 | 0.000 | 0.000 | 0.000 | 0.000             | 0.000             | 0.000             | 0.000             | 0.000  | 0.000  | 0.000  | 0.000  |
| 82.765               | 0.153       | 0.000       | 0.001       | 0.000       | 0.718 | 0.000 | 0.000 | 0.000 | 0.000             | 0.000             | 0.000             | 0.000             | 0.000  | 0.000  | 0.000  | 0.000  |
| 90.880               | 0.072       | 0.000       | 0.001       | 0.000       | 0.932 | 0.000 | 0.000 | 0.000 | 0.000             | 0.000             | 0.000             | 0.000             | 0.000  | 0.000  | 0.000  | 0.000  |
| 98.994               | 0.061       | 0.000       | 0.001       | 0.000       | 0.961 | 0.000 | 0.000 | 0.000 | 0.000             | 0.000             | 0.000             | 0.000             | 0.000  | 0.000  | 0.000  | 0.000  |
| 107.108              | 0.116       | 0.000       | 0.003       | 0.000       | 0.976 | 0.000 | 0.000 | 0.000 | 0.000             | 0.000             | 0.000             | 0.000             | 0.000  | 0.000  | 0.000  | 0.000  |

Figure S27. ANOVA—Curvature parameters—factor 2—machining.

| scale, $\mu\text{m}$ | $\kappa 1a$ | $\kappa 1q$ | $\kappa 2a$ | $\kappa 2q$ | $H_a$ | $H_q$ | $K_a$ | $K_q$ | $\kappa 1a_{abs}$ | $\kappa 1q_{abs}$ | $\kappa 2a_{abs}$ | $\kappa 2q_{abs}$ | $H_{a_{abs}}$ | $H_{q_{abs}}$ | $K_{a_{abs}}$ | $K_{q_{abs}}$ |
|----------------------|-------------|-------------|-------------|-------------|-------|-------|-------|-------|-------------------|-------------------|-------------------|-------------------|---------------|---------------|---------------|---------------|
| 1.622851             | 0.906       | 0.493       | 0.732       | 0.000       | 0.524 | 0.453 | 0.013 | 0.485 | 0.070             | 0.625             | 0.000             | 0.001             | 0.108         | 0.519         | 0.001         | 0.487         |
| 4.868553             | 0.454       | 0.050       | 0.444       | 0.000       | 0.719 | 0.045 | 0.439 | 0.004 | 0.202             | 0.019             | 0.000             | 0.000             | 0.274         | 0.015         | 0.002         | 0.004         |
| 8.114255             | 0.203       | 0.185       | 0.232       | 0.002       | 0.149 | 0.173 | 0.178 | 0.235 | 0.275             | 0.138             | 0.002             | 0.004             | 0.316         | 0.119         | 0.017         | 0.234         |
| 9.737106             | 0.168       | 0.178       | 0.100       | 0.006       | 0.382 | 0.173 | 0.221 | 0.242 | 0.248             | 0.116             | 0.004             | 0.010             | 0.283         | 0.120         | 0.033         | 0.241         |
| 11.35996             | 0.171       | 0.139       | 0.018       | 0.013       | 0.710 | 0.130 | 0.315 | 0.205 | 0.206             | 0.074             | 0.008             | 0.020             | 0.233         | 0.073         | 0.051         | 0.206         |
| 14.60566             | 0.188       | 0.147       | 0.001       | 0.033       | 0.802 | 0.135 | 0.495 | 0.245 | 0.152             | 0.117             | 0.025             | 0.040             | 0.153         | 0.113         | 0.088         | 0.253         |
| 17.85136             | 0.392       | 0.153       | 0.021       | 0.050       | 0.831 | 0.140 | 0.082 | 0.259 | 0.139             | 0.137             | 0.045             | 0.052             | 0.127         | 0.134         | 0.113         | 0.266         |
| 17.85136             | 0.392       | 0.153       | 0.021       | 0.050       | 0.831 | 0.140 | 0.082 | 0.259 | 0.139             | 0.137             | 0.045             | 0.052             | 0.127         | 0.134         | 0.113         | 0.266         |
| 21.09706             | 0.412       | 0.136       | 0.160       | 0.070       | 0.806 | 0.125 | 0.192 | 0.204 | 0.126             | 0.119             | 0.073             | 0.066             | 0.113         | 0.120         | 0.129         | 0.211         |
| 24.34277             | 0.585       | 0.196       | 0.534       | 0.086       | 0.846 | 0.185 | 0.269 | 0.304 | 0.123             | 0.212             | 0.093             | 0.079             | 0.109         | 0.208         | 0.142         | 0.309         |
| 25.96562             | 0.564       | 0.163       | 0.704       | 0.090       | 0.819 | 0.152 | 0.261 | 0.229 | 0.127             | 0.172             | 0.101             | 0.081             | 0.112         | 0.171         | 0.144         | 0.234         |
| 27.58847             | 0.511       | 0.172       | 0.778       | 0.092       | 0.727 | 0.162 | 0.262 | 0.220 | 0.127             | 0.187             | 0.106             | 0.080             | 0.113         | 0.184         | 0.147         | 0.224         |
| 30.83417             | 0.421       | 0.160       | 0.888       | 0.091       | 0.545 | 0.150 | 0.215 | 0.187 | 0.114             | 0.174             | 0.118             | 0.073             | 0.099         | 0.174         | 0.146         | 0.190         |
| 34.07987             | 0.289       | 0.150       | 0.715       | 0.088       | 0.381 | 0.139 | 0.119 | 0.218 | 0.091             | 0.166             | 0.131             | 0.062             | 0.076         | 0.165         | 0.138         | 0.220         |
| 42.19413             | 0.248       | 0.025       | 0.270       | 0.067       | 0.794 | 0.025 | 0.076 | 0.160 | 0.043             | 0.028             | 0.107             | 0.049             | 0.032         | 0.035         | 0.096         | 0.165         |
| 50.30838             | 0.473       | 0.025       | 0.345       | 0.119       | 0.967 | 0.024 | 0.050 | 0.236 | 0.065             | 0.049             | 0.178             | 0.084             | 0.046         | 0.048         | 0.100         | 0.251         |
| 58.42264             | 0.626       | 0.033       | 0.873       | 0.165       | 0.779 | 0.031 | 0.067 | 0.064 | 0.058             | 0.011             | 0.222             | 0.130             | 0.037         | 0.033         | 0.121         | 0.066         |
| 66.53689             | 0.357       | 0.027       | 0.808       | 0.182       | 0.543 | 0.025 | 0.906 | 0.078 | 0.044             | 0.010             | 0.234             | 0.147             | 0.024         | 0.033         | 0.126         | 0.074         |
| 74.65115             | 0.144       | 0.024       | 0.772       | 0.177       | 0.257 | 0.024 | 0.856 | 0.092 | 0.038             | 0.009             | 0.218             | 0.147             | 0.021         | 0.032         | 0.127         | 0.087         |
| 82.7654              | 0.043       | 0.025       | 0.568       | 0.140       | 0.099 | 0.026 | 0.552 | 0.102 | 0.035             | 0.012             | 0.164             | 0.123             | 0.023         | 0.032         | 0.120         | 0.099         |
| 90.87966             | 0.025       | 0.034       | 0.316       | 0.123       | 0.065 | 0.034 | 0.407 | 0.107 | 0.047             | 0.017             | 0.136             | 0.117             | 0.035         | 0.034         | 0.107         | 0.108         |
| 98.99391             | 0.023       | 0.042       | 0.163       | 0.097       | 0.093 | 0.041 | 0.394 | 0.104 | 0.055             | 0.023             | 0.101             | 0.098             | 0.045         | 0.035         | 0.094         | 0.106         |
| 107.1082             | 0.060       | 0.038       | 0.189       | 0.090       | 0.175 | 0.038 | 0.381 | 0.091 | 0.050             | 0.020             | 0.098             | 0.089             | 0.042         | 0.031         | 0.080         | 0.095         |

Figure S28. ANOVA—Curvature parameters—both factors together.

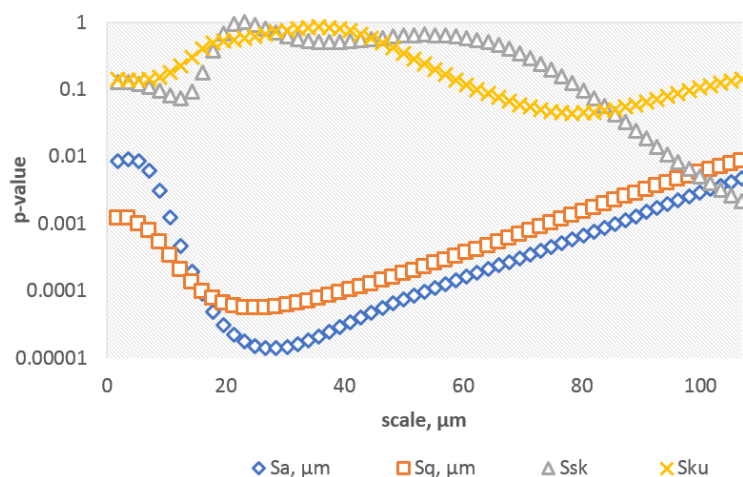

Figure S29. ANOVA—wavelet transformation- factor 1 - build direct.

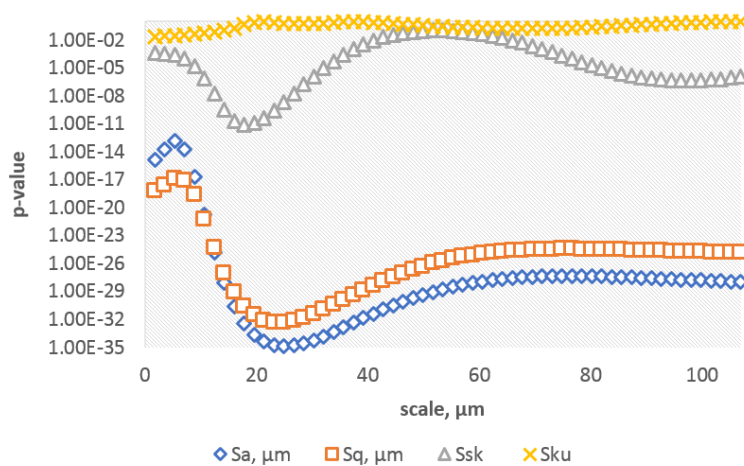

**Figure S30.** ANOVA—wavelet transformation - factor 2 - machining.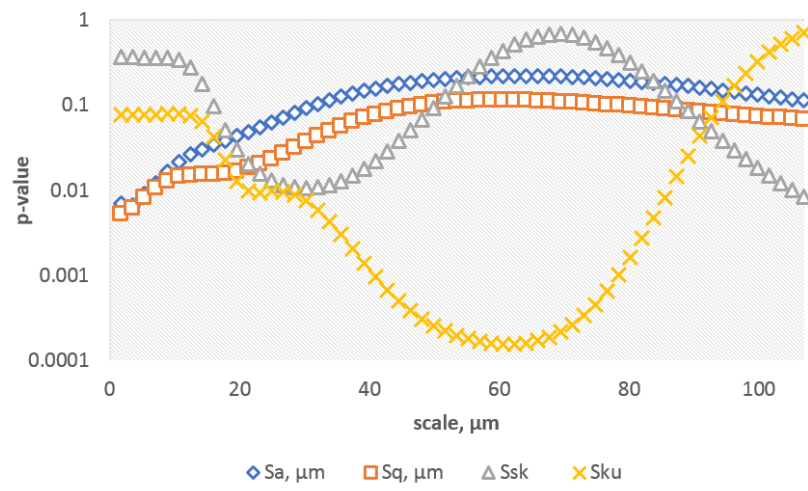**Figure S31.** ANOVA—wavelet transformation - both factors together.
